# Supplementary material for: Synoptic evaluation of carbon cycling in the Beaufort Sea during summer: contrasting river inputs, ecosystem metabolism and air–sea CO 2 fluxes
Source: Copernicus journal article supplement (doi:10.5194/bg-11-2827-2014), 2014-05-27
Supplement: Supplementary file 1 [file bg-11-2827-2014-supplement.zip]

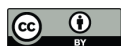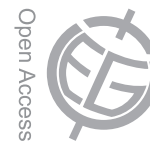

## *Supplement of*

# **Synoptic evaluation of carbon cycling in the Beaufort Sea during summer: contrasting river inputs, ecosystem metabolism and air–sea CO<sub>2</sub> fluxes**

**A. Forest et al.**

*Correspondence to:* A. Forest ([alexandre\\_forest@golder.com](mailto:alexandre_forest@golder.com))

- Supplement-Cover-Letter.pdf
- Supplement\_Data\_Sheet\_Malina.xlsx
