# Supplementary material for: Synoptic evaluation of carbon cycling in the Beaufort Sea during summer: contrasting river inputs, ecosystem metabolism and air–sea CO 2 fluxes
Source: Copernicus journal article supplement (doi:10.5194/bg-11-2827-2014), 2014-05-27
Supplement: Supplementary file 1 [file Supplement_Data_Sheet_Malina.xlsx]

## Sheet: DATA_SHEET_MALINA
Supplementary material associated with Biogeosciences paper:
Forest et al. 2014. Synoptic evaluation of carbon cycling
in the Beaufort Sea during summer: contrasting river inputs,
ecosystem metabolism and air-sea CO2 fluxes
**	The data below present all the detailed results of the gridded (modelled) variables
**	Each column corresponds to a pixel of the model domain (green area in the map at the right)
**	The mixed-layer depth (MLD) separates the surface and subsurface water layers
**	The surface water layer extends from the surface down to the MLD
**	The subsurface water layer extends from the MLD down to 100 m depth maximum
**	Please note that the value -9999 means no available data
**	All original raw data are available in the public domain through the web-based database below
	http://www.obs-vlfr.fr/proof/php/malina/x_datalist_1.php?xxop=malina&xxcamp=malina
%%%%%%%%%	%%%%%%%%%%%%%%%%%%%%%%%%%%%%%%%%%%%%%%%%%%%%%%%%%%%%%	%%%%%%%%%	%%%%%%%%%	%%%%%%%%%	%%%%%%%%%	%%%%%%%%%	%%%%%%%%%	%%%%%%%%%	%%%%%%%%%	%%%%%%%%%	%%%%%%%%%	%%%%%%%%%	%%%%%%%%%	%%%%%%%%%	%%%%%%%%%	%%%%%%%%%	%%%%%%%%%	%%%%%%%%%	%%%%%%%%%	%%%%%%%%%	%%%%%%%%%	%%%%%%%%%	%%%%%%%%%	%%%%%%%%%	%%%%%%%%%	%%%%%%%%%	%%%%%%%%%	%%%%%%%%%	%%%%%%%%%	%%%%%%%%%	%%%%%%%%%	%%%%%%%%%	%%%%%%%%%	%%%%%%%%%	%%%%%%%%%	%%%%%%%%%	%%%%%%%%%	%%%%%%%%%	%%%%%%%%%	%%%%%%%%%	%%%%%%%%%	%%%%%%%%%	%%%%%%%%%	%%%%%%%%%	%%%%%%%%%	%%%%%%%%%	%%%%%%%%%	%%%%%%%%%	%%%%%%%%%
Pixel info	Latitude (degrees North)	69.05	69.05	69.112	69.112	69.112	69.112	69.174	69.174	69.174	69.174	69.174	69.236	69.236	69.236	69.236	69.236	69.236	69.298	69.298	69.298	69.298	69.298	69.298	69.298	69.298	69.298	69.298	69.36	69.36	69.36	69.36	69.36	69.36	69.36	69.36	69.36	69.36	69.422	69.422	69.422	69.422	69.422	69.422	69.422	69.422	69.422	69.422	69.422
	Longitude (degrees East)	-137.1	-137.4	-136.8	-137.1	-137.4	-137.7	-136.8	-137.1	-137.4	-137.7	-138	-136.5	-136.8	-137.1	-137.4	-137.7	-138	-135.9	-136.2	-136.5	-136.8	-137.1	-137.4	-137.7	-138	-138.3	-138.6	-135.9	-136.2	-136.5	-136.8	-137.1	-137.4	-137.7	-138	-138.3	-138.6	-133.2	-135.9	-136.2	-136.5	-136.8	-137.1	-137.4	-137.7	-138	-138.3	-138.6
	Bottom depth (m)	3.8818	5.46314	2.11978	4.02118	8.91824	15.544	2.97746	5.30169	12.2499	23.3618	28.0862	2.61655	3.64056	7.22939	23.2074	33.4148	35.0319	2.28973	2.3935	2.99408	4.38308	11.344	32.2388	38.4535	38.3207	8.13287	2.35736	6.4159	3.0467	3.8989	5.74823	16.0086	38.5966	41.3481	44.5427	27.1949	11.4219	2.08414	5.20346	3.11381	4.96682	8.58371	23.9528	44.4698	46.3091	55.261	47.6595	15.3635
	Sea ice concentration (%)	0	0	0	0	0	0	0	0	0	0	0	0	0	0	0	0	0	0	0	0	0	0	0	0	0	0	0	0	0	0	0	0	0	0	0	0	0	0	0	0	0	0	0	0	0	0	0	0
	Mixed layer-depth (m)	2.1262	2.46874	2.11978	2.54395	2.86418	3.22076	2.69716	2.96215	3.25975	3.59035	3.95348	2.61655	3.13656	3.38198	3.65601	3.96002	4.29391	2.28973	2.3935	2.99408	3.58097	3.80567	4.05435	4.33044	4.63479	4.9663	2.35736	3.47443	3.0467	3.84069	4.03344	4.2368	4.45763	4.70321	4.97733	5.27908	5.60539	2.08414	3.94159	3.11381	4.31249	4.49643	4.6803	4.87126	5.08194	5.32383	5.5984	5.89978
Water layer	%%%%%%%%%%%%%%%%%%%%%%%%%%%%%%%%%%%%%%%%%%%%%%%%%%%%%	%%%%%%%%%	%%%%%%%%%	%%%%%%%%%	%%%%%%%%%	%%%%%%%%%	%%%%%%%%%	%%%%%%%%%	%%%%%%%%%	%%%%%%%%%	%%%%%%%%%	%%%%%%%%%	%%%%%%%%%	%%%%%%%%%	%%%%%%%%%	%%%%%%%%%	%%%%%%%%%	%%%%%%%%%	%%%%%%%%%	%%%%%%%%%	%%%%%%%%%	%%%%%%%%%	%%%%%%%%%	%%%%%%%%%	%%%%%%%%%	%%%%%%%%%	%%%%%%%%%	%%%%%%%%%	%%%%%%%%%	%%%%%%%%%	%%%%%%%%%	%%%%%%%%%	%%%%%%%%%	%%%%%%%%%	%%%%%%%%%	%%%%%%%%%	%%%%%%%%%	%%%%%%%%%	%%%%%%%%%	%%%%%%%%%	%%%%%%%%%	%%%%%%%%%	%%%%%%%%%	%%%%%%%%%	%%%%%%%%%	%%%%%%%%%	%%%%%%%%%	%%%%%%%%%	%%%%%%%%%
Surface	MODIS-derived primary production (14 June - 19 July 2009) (mg C m-2 d-1)	4661.66	4619.04	4544.27	4509.97	4455.42	4380.85	4402.62	4358.33	4291.59	4203.61	4095.94	4289.52	4261.14	4206.76	4127.57	4025.73	3903.92	4139.31	4160.08	4154.1	4119.17	4054.79	3962.78	3846.5	3710.04	3557.98	3395.09	4006.27	4024.6	4015.37	3974.69	3900.94	3795.98	3664.56	3513	3347.92	3175.43	2828.55	3869.16	3882.26	3869.2	3823.93	3742.31	3625.12	3478.31	3311.28	3134.45	2955.83
Surface	MODIS-derived primary production (20 July - 24 August 2009)	477.688	365.976	604.666	491.649	379.605	268.877	620.752	505.375	392.921	284.022	179.156	758.715	636.974	518.638	405.534	298.651	198.429	1031.66	908.358	781.135	654.013	531.516	417.21	312.897	218.283	131.188	49.5631	1063.41	938.104	806.696	673.412	544.923	428.262	327.952	239.892	159.828	85.6825	1679.79	1095.48	969.776	836.214	697.678	561.541	441.101	346.886	264.306	190.279	123.388
Surface	Atmospheric partial pressure of CO2 (pCO2) (µatm)	373.53	374.349	372.853	373.581	374.372	375.234	372.933	373.628	374.399	375.244	376.148	372.393	373.025	373.696	374.448	375.274	376.151	371.368	371.93	372.524	373.15	373.818	374.549	375.337	376.179	377.051	377.904	371.529	372.072	372.657	373.289	373.968	374.688	375.441	376.253	377.071	377.823	369.528	371.68	372.198	372.772	373.406	374.098	374.837	375.608	376.412	377.103	377.706
Surface	Seawater CO2 fugacity (µatm)	548.072	541.121	527.266	523	515.471	504.75	502.094	498.052	489.237	477.615	464.713	479.498	476.011	470.532	461.093	449.121	437.11	462.381	457.154	452.017	446.523	439.552	430.157	418.99	409.01	401.157	395.276	438.138	431.003	423.638	415.807	407.172	397.685	388.318	381.387	377.397	375.501	446.313	414.377	405.303	395.74	385.866	376.064	366.997	359.758	356.301	355.952	358.021
Surface	Air-sea CO2 fluxes (mmol C m-2 d-1)	22.8089	22.5249	19.431	19.3961	18.8839	17.8676	16.1875	16.0337	15.2375	13.9757	12.4282	12.9806	12.8577	12.4229	11.4211	10.0131	8.4835	10.2579	9.97834	9.6336	9.17138	8.44453	7.33801	5.94321	4.59617	3.46277	2.56406	7.51338	6.91599	6.20869	5.36265	4.34058	3.13741	1.88393	0.88277	0.245433	-0.101705	5.06023	4.84398	3.93349	2.87348	1.68749	0.429254	-0.805168	-1.8425	-2.40509	-2.51524	-2.28535
Surface	Total dissolved inorganic carbon (DIC) concentration (umol/kg)	1869.35	1865.84	1878.18	1870.82	1870.82	1874.13	1881.45	1871.07	1879.03	1883.91	1880.06	1881.95	1879.25	1884.91	1894.95	1895.93	1880.22	1884.53	1881.46	1881.73	1887.35	1899.62	1907.33	1903.26	1868.31	1844.97	1828.83	1878.76	1876.69	1879.16	1887.63	1900.75	1908.94	1879.18	1841.63	1829.88	1815.15	1955.1	1872.33	1869.82	1870.68	1874.47	1877.48	1870.6	1845.43	1844.38	1821.99	1798.16
Surface	Total dissolved organic carbon (DOC) concentration (mg C m-3)	4625.46	4165.29	5039.88	4607.23	3918.21	3092.97	5339.53	4470.08	3605.25	2688.6	1779.13	5046.14	4778.92	4137.75	3224.56	2246.86	1376.61	4812.78	4809.85	4645.6	4241.66	3591.88	2658.87	1770.66	1019.31	-9999	-9999	4539.72	4451.72	4198.09	3743.6	3085.06	2250.72	1422.56	782.826	-9999	-9999	3108.27	4206.84	4057.46	3769.4	3331.86	2753.68	2072.42	1367.38	799.623	504.886	-9999
Surface	Total particulate organic carbon (POC) concentration (mg C m-3)	1090.6	791.405	1078.1	794.913	543.618	352.432	807.999	462.796	325.269	243.069	159.517	590.072	413.679	254.36	219.165	197.211	142.74	531.717	465.782	363.103	251.148	200.372	212.445	196.671	130.83	70.2703	13.9962	368.532	303.272	232.72	184.981	182.192	201.634	164.117	107.319	74.8986	39.7225	417.102	249.04	199.619	162.14	148.541	154.136	153.55	123.578	112.083	96.1485	70.7485
Surface	Vertical flux of particulate organic carbon (POC) below mixed-layer (mg C m-2 d-1)	2961.21	2428.11	3329.34	2818.18	2300.67	1778.77	3174.89	2675.01	2172.94	1671.35	1172.31	3506.78	3020.45	2531.69	2044.71	1563.29	1089.97	4281.86	3816.65	3343.53	2866.08	2388.65	1916.44	1454.85	1007.77	576.27	159.118	4103.47	3643.83	3178.59	2711.49	2246.76	1789.77	1347.56	927.213	531.146	153.537	7320.36	3920	3466.29	3010.09	2555.56	2106.71	1667.87	1245.76	852.107	496.817	159.112
Surface	In situ gross primary production (mg C m-3 d-1)	144.779	77.0922	173.154	110.022	60.466	22.2495	130.694	85.1828	47.943	18.0872	-9999	139.376	100.41	66.7697	38.3198	14.8107	-9999	173.415	138.172	106.465	78.0737	52.8868	30.938	12.3237	-9999	-9999	-9999	130.024	104.887	82.0455	61.2715	42.4058	25.4552	10.6609	-9999	-9999	-9999	193.497	97.8892	79.9705	63.5466	48.4596	34.5416	21.683	10.0229	0.156968	-9999	-9999
Surface	Phytoplankton respiration (mg C m-3 d-1)	14.4779	7.70922	17.3154	11.0022	6.0466	2.22495	13.0694	8.51828	4.7943	1.80872	-9999	13.9376	10.041	6.67697	3.83198	1.48107	-9999	17.3415	13.8172	10.6465	7.80737	5.28868	3.0938	1.23237	-9999	-9999	-9999	13.0024	10.4887	8.20455	6.12715	4.24058	2.54552	1.06609	-9999	-9999	-9999	19.3497	9.78892	7.99705	6.35466	4.84596	3.45416	2.1683	1.00229	0.0156968	-9999	-9999
Surface	Phytoplankton biomass (mg C m-3 d-1)	413.064	329.369	390.967	324.318	265.928	215.381	307.443	260.541	217.86	179.516	145.445	283.653	246.93	212.371	180.121	150.327	123.111	288.858	258.045	228.711	200.895	174.543	149.595	126.052	104.008	83.6248	65.0528	234.537	209.858	186.541	164.59	143.883	124.226	105.429	87.407	70.2651	54.4432	391.308	193.072	172.546	153.263	135.254	118.436	102.605	87.4636	72.6755	57.9872	44.4902
Surface	Phytoplankton exudation (mg C m-3 d-1)	21.8845	11.6531	26.1737	16.6307	9.13995	3.3632	19.7555	12.8761	7.24698	2.73403	-9999	21.0678	15.1778	10.0928	5.79236	2.23876	-9999	26.2131	20.8858	16.0931	11.8015	7.99428	4.67654	1.86283	-9999	-9999	-9999	19.6543	15.8545	12.4019	9.2617	6.40999	3.84777	1.61148	-9999	-9999	-9999	29.2487	14.7968	12.0882	9.6056	7.32507	5.22125	3.27757	1.51504	0.023727	-9999	-9999
Surface	Bacterial respiration (mg C m-3 d-1)	20.3435	26.7574	12.6101	19.4615	25.8478	29.8729	10.8526	18.5119	25.6793	28.9087	30.3072	7.697	13.0866	20.7405	27.3551	28.2774	28.4629	0.499292	4.94553	9.6762	15.2396	22.2882	28.4311	26.1725	25.6455	26.1105	26.9359	3.50558	6.54137	10.0169	14.0483	18.2893	20.972	20.6254	21.3834	22.9123	24.5638	2.36081	5.61736	7.30303	9.35665	11.6914	13.9288	15.3239	15.7136	16.8767	19.9533	22.6129
Surface	Bacterial production (mg C m-3 d-1)	9.46206	13.1175	5.17901	8.45323	11.816	14.2997	4.16187	7.49367	10.9246	12.8643	14.039	2.60122	4.67359	7.80368	10.8025	11.6691	12.218	0.141232	1.47572	3.04454	5.05086	7.76648	10.3856	9.98324	10.169	10.715	11.3949	0.930985	1.82087	2.92431	4.30229	5.87347	7.05176	7.23891	7.79799	8.63978	9.54272	0.443887	1.39918	1.89223	2.52536	3.29175	4.09624	4.70954	5.04008	5.62459	6.86526	8.01036
Surface	Bacterial biomass (mg C m-3)	74.1967	68.3729	65.1733	61.9659	58.4142	54.7111	55.0287	53.1546	50.8501	48.2632	45.5276	48.3261	47.6208	46.4444	44.8666	42.982	40.8938	42.2067	42.4585	42.3419	41.8791	41.0796	39.9539	38.5372	36.8958	35.1061	33.2377	37.8528	37.8495	37.613	37.1939	36.5927	35.7715	34.6951	33.3774	31.8789	30.2604	31.0478	34.5198	34.1711	33.7093	33.2097	32.6851	32.0766	31.2787	30.2178	28.9276	27.4583
Surface	Bacterial excretion (mg C m-3 d-1)	3.05153	4.0136	1.89151	2.91922	3.87717	4.48094	1.62789	2.77679	3.85189	4.33631	4.54608	1.15455	1.96299	3.11108	4.10327	4.2416	4.26944	0.0748938	0.74183	1.45143	2.28594	3.34323	4.26466	3.92587	3.84683	3.91658	4.04039	0.525837	0.981205	1.50254	2.10724	2.7434	3.14579	3.09381	3.20751	3.43685	3.68457	0.354122	0.842603	1.09545	1.4035	1.75372	2.08932	2.29858	2.35705	2.5315	2.99299	3.39193
Surface	Heterotrophic protist respiration (mg C m-3 d-1)	99.6706	82.8883	87.0476	75.5793	64.6276	54.5733	66.3745	58.8259	51.2829	44.0704	37.3932	56.7707	51.8393	46.5816	41.18	35.8417	30.7556	51.1164	48.1771	44.8125	41.1503	37.2861	33.294	29.2548	25.3029	21.5129	17.9567	41.234	38.7088	35.9412	33.0285	30.0303	26.9742	23.8788	20.7571	17.6213	14.6222	25.7973	33.8686	31.5888	29.1758	26.7122	24.2512	21.8129	19.3784	16.8751	14.1519	11.5833
Surface	Heterotrophic protist production (mg C m-3 d-1)	49.5703	41.2238	43.2924	37.5887	32.142	27.1416	33.0108	29.2565	25.5051	21.918	18.5972	28.2344	25.7818	23.1669	20.4805	17.8255	15.296	25.4223	23.9605	22.2871	20.4658	18.5439	16.5585	14.5496	12.5842	10.6993	8.93063	20.5074	19.2515	17.875	16.4264	14.9353	13.4154	11.8759	10.3234	8.76379	7.27225	12.8301	16.8442	15.7104	14.5103	13.2851	12.0611	10.8485	9.63768	8.3927	7.03832	5.76085
Surface	Heterotrophic protist biomass (mg C m-3)	442.676	389.798	380.044	347.654	314.775	282.612	298.926	279.319	257.909	235.571	213.104	250.164	239.996	227.572	213.181	197.243	180.344	210.152	206.768	201.627	194.924	186.68	176.803	165.247	152.221	138.293	124.21	171.666	168.491	164.234	159.117	153.172	146.194	137.78	127.563	115.718	103.607	84.4856	142.32	138.861	134.665	129.988	124.968	119.539	113.263	105.221	94.3946	83.8825
Surface	Heterotrophic protist egestion/excretion (mg C m-3 d-1)	80.839	67.2276	70.6011	61.2995	52.417	44.2624	53.8339	47.7114	41.5937	35.7439	30.3282	46.0446	42.0449	37.7806	33.3995	29.0698	24.9447	41.4586	39.0746	36.3457	33.3755	30.2414	27.0035	23.7274	20.5222	17.4483	14.564	33.4433	31.3953	29.1505	26.7882	24.3564	21.8778	19.3672	16.8353	14.292	11.8596	20.9232	27.4695	25.6205	23.6634	21.6653	19.6693	17.6916	15.7171	13.6868	11.4781	9.39477
Surface	Small zooplankton (50-200 microns) respiration (mg C m-3 d-1)	0.112073	0.094317	0.101015	0.0877611	0.0754059	0.0641716	0.0799459	0.0702689	0.0610385	0.0524714	0.0446913	0.0724301	0.0647147	0.0570517	0.0497095	0.0428686	0.0366435	0.0718171	0.0660595	0.0597627	0.0532117	0.0467115	0.0405129	0.0347846	0.029637	0.0251715	0.0214809	0.0607827	0.0556483	0.0500999	0.0442738	0.0384297	0.0328637	0.0277834	0.0233648	0.0197494	0.0170592	0.0680292	0.051987	0.0473442	0.0424482	0.0372121	0.0317351	0.0263945	0.0215242	0.0175543	0.0147652	0.0131708
Surface	Small zooplankton (50-200 microns) production (mg C m-3 d-1)	0.0588854	0.0495408	0.053066	0.0460879	0.0395838	0.0336702	0.0419787	0.036881	0.0320198	0.0275091	0.0234137	0.0380325	0.0339643	0.029925	0.0260564	0.0224532	0.0191758	0.0377305	0.0346918	0.0313689	0.0279126	0.0244839	0.0212159	0.0181974	0.0154866	0.013137	0.0111975	0.0319253	0.0292155	0.0262869	0.0232117	0.0201273	0.0171907	0.014512	0.0121844	0.0102826	0.00887089	0.0356643	0.0272971	0.0248474	0.0222636	0.0194994	0.0166074	0.0137878	0.0112178	0.00912567	0.00765982	0.00682716
Surface	Small zooplankton (50-200 microns) biomass (mg C m-3)	1.92466	1.6538	1.69399	1.50474	1.32192	1.1505	1.33634	1.20227	1.06948	0.941806	0.822191	1.17949	1.07751	0.973018	0.869775	0.770045	0.676054	1.1182	1.05162	0.970822	0.882168	0.792629	0.706401	0.624613	0.548359	0.480795	0.423511	0.945202	0.886201	0.814085	0.731746	0.647063	0.568033	0.496753	0.43358	0.381658	0.341062	0.845159	0.805937	0.754343	0.692653	0.616505	0.52976	0.447036	0.377834	0.327983	0.292105	0.267918
Surface	Small zooplankton (50-200 microns) egestion/excretion (mg C m-3 d-1)	0.0931104	0.0783478	0.0839167	0.0728953	0.0626219	0.0532808	0.0664004	0.0583515	0.0506749	0.0435507	0.0370817	0.0601582	0.0537381	0.0473626	0.041255	0.0355654	0.030389	0.059663	0.0548701	0.0496286	0.044176	0.0387662	0.0336086	0.0288434	0.0245625	0.0208502	0.0177837	0.0504904	0.0462162	0.0415972	0.036747	0.0318821	0.0272493	0.023022	0.0193468	0.0163416	0.0141079	0.0564627	0.0431782	0.0393137	0.0352381	0.0308788	0.0263185	0.021872	0.017818	0.0145154	0.0121979	0.0108769
Surface	Mesozoplankton (>200 microns) respiration (mg C m-3 d-1)	0.752852	0.647276	0.652151	0.578688	0.507941	0.441665	0.505695	0.453441	0.402211	0.35327	0.307635	0.441116	0.399915	0.358716	0.318804	0.280802	0.245401	0.420851	0.391521	0.357107	0.320369	0.284319	0.250644	0.219539	0.191168	0.166727	0.14677	0.352131	0.325893	0.294623	0.259649	0.224565	0.192993	0.165749	0.142607	0.12464	0.111755	0.308926	0.296915	0.273978	0.246965	0.214022	0.177043	0.142781	0.115748	0.098245	0.0870173	0.0812265
Surface	Mesozoplankton (>200 microns) production (mg C m-3 d-1)	0.398782	0.342859	0.345441	0.306528	0.269053	0.233947	0.267864	0.240185	0.213049	0.187125	0.162953	0.233657	0.211833	0.19001	0.168869	0.14874	0.129988	0.222923	0.207386	0.189158	0.169698	0.150602	0.132765	0.116289	0.101261	0.0883145	0.0777431	0.186522	0.172624	0.15606	0.137535	0.118951	0.102227	0.0877962	0.0755382	0.0660214	0.0591961	0.163637	0.157275	0.145125	0.130816	0.113366	0.0937786	0.0756305	0.0613113	0.0520399	0.0460926	0.0430253
Surface	Mesozoplankton (>200 microns) biomass (mg C m-3)	31.3833	26.8683	27.3343	24.1798	21.1217	18.2458	21.2637	19.0002	16.7615	14.6116	12.6007	18.645	16.8808	15.0846	13.3228	11.6319	10.049	17.7554	16.5883	15.1581	13.5871	12.012	10.5141	9.11203	7.82289	6.70531	5.7875	14.8848	13.8501	12.5621	11.0753	9.54736	8.14026	6.89747	5.82546	4.98361	4.36894	11.4081	12.5565	11.6661	10.5741	9.18982	7.59053	6.07301	4.83446	3.99687	3.45027	3.14234
Surface	Mesozoplankton (>200 microns) excretion/egestion (mg C m-3 d-1)	0.627731	0.539702	0.543766	0.482512	0.423523	0.368262	0.421651	0.378081	0.335365	0.294558	0.256508	0.367805	0.333451	0.299099	0.26582	0.234134	0.204616	0.350908	0.326452	0.297758	0.267125	0.237066	0.208988	0.183053	0.159397	0.139018	0.122377	0.293608	0.271731	0.245658	0.216496	0.187243	0.160918	0.138202	0.118906	0.103926	0.0931819	0.257584	0.247569	0.228444	0.20592	0.178453	0.147619	0.119052	0.0965115	0.0819171	0.0725553	0.067727
Surface	Net community production (mg C m-3 d-1)	9.42173	-41.0043	55.4277	3.31221	-36.6393	-64.9275	39.8119	-1.197	-34.2768	-57.1065	-68.0528	60.4571	24.9783	-7.64515	-34.4158	-51.1131	-59.5005	103.965	70.7741	40.9133	13.5027	-12.3072	-34.1721	-44.5902	-51.1692	-47.8154	-45.0609	71.8693	48.7664	27.5381	7.76362	-10.4174	-25.2623	-35.103	-42.3065	-40.678	-39.3149	145.612	48.2655	32.7603	18.3701	4.95872	-7.30136	-17.7912	-26.2087	-33.7263	-34.2069	-34.2906
Water layer	%%%%%%%%%%%%%%%%%%%%%%%%%%%%%%%%%%%%%%%%%%%%%%%%%%%%%	%%%%%%%%%	%%%%%%%%%	%%%%%%%%%	%%%%%%%%%	%%%%%%%%%	%%%%%%%%%	%%%%%%%%%	%%%%%%%%%	%%%%%%%%%	%%%%%%%%%	%%%%%%%%%	%%%%%%%%%	%%%%%%%%%	%%%%%%%%%	%%%%%%%%%	%%%%%%%%%	%%%%%%%%%	%%%%%%%%%	%%%%%%%%%	%%%%%%%%%	%%%%%%%%%	%%%%%%%%%	%%%%%%%%%	%%%%%%%%%	%%%%%%%%%	%%%%%%%%%	%%%%%%%%%	%%%%%%%%%	%%%%%%%%%	%%%%%%%%%	%%%%%%%%%	%%%%%%%%%	%%%%%%%%%	%%%%%%%%%	%%%%%%%%%	%%%%%%%%%	%%%%%%%%%	%%%%%%%%%	%%%%%%%%%	%%%%%%%%%	%%%%%%%%%	%%%%%%%%%	%%%%%%%%%	%%%%%%%%%	%%%%%%%%%	%%%%%%%%%	%%%%%%%%%	%%%%%%%%%
Subsurface	Total dissolved inorganic carbon (DIC) concentration (umol/kg)	-9999	-9999	-9999	-9999	-9999	1971.76	-9999	-9999	1983.32	1984.2	1987.52	-9999	-9999	-9999	1995.57	1996.62	2000.47	-9999	-9999	-9999	-9999	2009.87	2008.07	2009.18	2013.61	-9999	-9999	-9999	-9999	-9999	-9999	2023.29	2021.32	2022.26	2027.32	2036.6	2048.18	-9999	-9999	-9999	-9999	-9999	2037.63	2036.12	2036.88	2042.46	2054.65	2067.47
Subsurface	Total dissolved organic carbon (DOC) concentration (mg C m-3)	-9999	-9999	-9999	-9999	-9999	692.287	-9999	-9999	708.519	704.767	701.394	-9999	-9999	-9999	721.46	717.233	713.338	-9999	-9999	-9999	-9999	739.522	734.42	729.691	725.301	-9999	-9999	-9999	-9999	-9999	-9999	753.201	747.492	742.165	737.336	732.687	728.065	-9999	-9999	-9999	-9999	-9999	767.264	760.917	754.77	749.497	744.563	739.489
Subsurface	Total particulate organic carbon (POC) concentration (mg C m-3)	-9999	-9999	-9999	-9999	-9999	165.413	-9999	-9999	153.473	154.69	155.921	-9999	-9999	-9999	142.614	143.877	145.504	-9999	-9999	-9999	-9999	131.085	131.67	132.932	134.949	-9999	-9999	-9999	-9999	-9999	-9999	120.374	120.665	121.871	124.237	127.877	132.245	-9999	-9999	-9999	-9999	-9999	109.531	109.639	110.85	113.49	118.293	123.629
Subsurface	Vertical flux of particulate organic carbon (POC) at 100 m depth (mg C m-2 d-1)	-9999	-9999	-9999	-9999	-9999	-9999	-9999	-9999	-9999	-9999	-9999	-9999	-9999	-9999	-9999	-9999	-9999	-9999	-9999	-9999	-9999	-9999	-9999	-9999	-9999	-9999	-9999	-9999	-9999	-9999	-9999	-9999	-9999	-9999	-9999	-9999	-9999	-9999	-9999	-9999	-9999	-9999	-9999	-9999	-9999	-9999	-9999	-9999
Subsurface	In situ gross primary production (mg C m-3 d-1)	-9999	-9999	-9999	-9999	-9999	-9999	-9999	-9999	-9999	-9999	-9999	-9999	-9999	-9999	-9999	-9999	-9999	-9999	-9999	-9999	-9999	-9999	-9999	-9999	-9999	-9999	-9999	-9999	-9999	-9999	-9999	-9999	-9999	-9999	-9999	0.11001	1.23265	-9999	-9999	-9999	-9999	-9999	0.00310938	0.0269355	0.0624226	0.10428	0.241813	1.60476
Subsurface	Phytoplankton respiration (mg C m-3 d-1)	-9999	-9999	-9999	-9999	-9999	-9999	-9999	-9999	-9999	-9999	-9999	-9999	-9999	-9999	-9999	-9999	-9999	-9999	-9999	-9999	-9999	-9999	-9999	-9999	-9999	-9999	-9999	-9999	-9999	-9999	-9999	-9999	-9999	-9999	-9999	0.011001	0.123265	-9999	-9999	-9999	-9999	-9999	0.000310938	0.00269355	0.00624226	0.010428	0.0241813	0.160476
Subsurface	Phytoplankton biomass (mg C m-3 d-1)	-9999	-9999	-9999	-9999	-9999	140.051	-9999	-9999	173.71	81.5226	68.5481	-9999	-9999	-9999	74.1372	50.8349	50.028	-9999	-9999	-9999	-9999	170.368	47.3968	40.4924	42.1587	-9999	-9999	-9999	-9999	-9999	-9999	99.4668	35.7164	34.4819	32.8637	60.5707	231.836	-9999	-9999	-9999	-9999	-9999	54.7109	27.7289	27.6553	23.5419	28.4688	128.512
Subsurface	Phytoplankton exudation (mg C m-3 d-1)	-9999	-9999	-9999	-9999	-9999	-9999	-9999	-9999	-9999	-9999	-9999	-9999	-9999	-9999	-9999	-9999	-9999	-9999	-9999	-9999	-9999	-9999	-9999	-9999	-9999	-9999	-9999	-9999	-9999	-9999	-9999	-9999	-9999	-9999	-9999	0.0166289	0.186326	-9999	-9999	-9999	-9999	-9999	0.000470008	0.00407153	0.00943571	0.0157628	0.0365521	0.242572
Subsurface	Bacterial respiration (mg C m-3 d-1)	-9999	-9999	-9999	-9999	-9999	51.2998	-9999	-9999	46.0235	28.8305	29.7419	-9999	-9999	-9999	18.8159	17.4189	20.9041	-9999	-9999	-9999	-9999	28.0647	11.4028	13.5553	16.9576	-9999	-9999	-9999	-9999	-9999	-9999	15.9921	8.59069	11.2442	12.3346	24.7186	103.251	-9999	-9999	-9999	-9999	-9999	7.50006	5.6342	7.36322	6.87148	9.51705	49.2717
Subsurface	Bacterial production (mg C m-3 d-1)	-9999	-9999	-9999	-9999	-9999	9.0529	-9999	-9999	8.12179	5.08774	5.24857	-9999	-9999	-9999	3.32045	3.07392	3.68896	-9999	-9999	-9999	-9999	4.9526	2.01226	2.39211	2.99253	-9999	-9999	-9999	-9999	-9999	-9999	2.82214	1.516	1.98427	2.17669	4.36211	18.2208	-9999	-9999	-9999	-9999	-9999	1.32354	0.99427	1.29939	1.21261	1.67948	8.695
Subsurface	Bacterial biomass (mg C m-3)	-9999	-9999	-9999	-9999	-9999	0.811472	-9999	-9999	1.11233	0.505779	0.414376	-9999	-9999	-9999	0.511472	0.339503	0.325331	-9999	-9999	-9999	-9999	1.32656	0.354806	0.293057	0.29686	-9999	-9999	-9999	-9999	-9999	-9999	4.60333	1.76034	1.77168	1.73063	3.2312	12.7197	-9999	-9999	-9999	-9999	-9999	6.52622	3.2564	3.17637	2.63136	3.05574	13.4909
Subsurface	Bacterial excretion (mg C m-3 d-1)	-9999	-9999	-9999	-9999	-9999	7.69497	-9999	-9999	6.90353	4.32458	4.46129	-9999	-9999	-9999	2.82238	2.61283	3.13562	-9999	-9999	-9999	-9999	4.20971	1.71042	2.0333	2.54365	-9999	-9999	-9999	-9999	-9999	-9999	2.39882	1.2886	1.68663	1.85019	3.70779	15.4876	-9999	-9999	-9999	-9999	-9999	1.12501	0.845129	1.10448	1.03072	1.42756	7.39075
Subsurface	Heterotrophic protist respiration (mg C m-3 d-1)	-9999	-9999	-9999	-9999	-9999	2.42317	-9999	-9999	3.88073	1.4946	0.988727	-9999	-9999	-9999	1.75173	1.00278	0.797195	-9999	-9999	-9999	-9999	5.00018	1.20156	0.871418	0.750918	-9999	-9999	-9999	-9999	-9999	-9999	3.142	0.985431	0.819991	0.660818	0.999738	3.06892	-9999	-9999	-9999	-9999	-9999	1.89024	0.845151	0.735643	0.538868	0.545927	2.06292
Subsurface	Heterotrophic protist production (mg C m-3 d-1)	-9999	-9999	-9999	-9999	-9999	1.20514	-9999	-9999	1.93005	0.743327	0.491735	-9999	-9999	-9999	0.871207	0.498726	0.396478	-9999	-9999	-9999	-9999	2.4868	0.597586	0.433392	0.373462	-9999	-9999	-9999	-9999	-9999	-9999	1.56264	0.490096	0.407815	0.328652	0.497211	1.5263	-9999	-9999	-9999	-9999	-9999	0.940094	0.420328	0.365865	0.268001	0.271512	1.02597
Subsurface	Heterotrophic protist biomass (mg C m-3)	-9999	-9999	-9999	-9999	-9999	21.4412	-9999	-9999	29.8548	13.2643	10.6238	-9999	-9999	-9999	13.6394	8.83993	8.27549	-9999	-9999	-9999	-9999	36.0641	9.40133	7.57791	7.49035	-9999	-9999	-9999	-9999	-9999	-9999	22.9857	7.70724	7.0025	6.31951	11.0798	40.8488	-9999	-9999	-9999	-9999	-9999	14.0085	6.59007	6.15218	4.94069	5.62863	24.4907
Subsurface	Heterotrophic protist egestion/excretion (mg C m-3 d-1)	-9999	-9999	-9999	-9999	-9999	1.96534	-9999	-9999	3.14752	1.21221	0.80192	-9999	-9999	-9999	1.42076	0.81332	0.646574	-9999	-9999	-9999	-9999	4.05546	0.974542	0.706774	0.609041	-9999	-9999	-9999	-9999	-9999	-9999	2.54836	0.799246	0.665064	0.535965	0.81085	2.48908	-9999	-9999	-9999	-9999	-9999	1.5331	0.68547	0.596652	0.437055	0.44278	1.67315
Subsurface	Small zooplankton (50-200 microns) respiration (mg C m-3 d-1)	-9999	-9999	-9999	-9999	-9999	-9999	-9999	-9999	-9999	-9999	-9999	-9999	-9999	-9999	-9999	-9999	-9999	-9999	-9999	-9999	-9999	-9999	-9999	-9999	-9999	-9999	-9999	-9999	-9999	-9999	-9999	-9999	-9999	-9999	-9999	-9999	-9999	-9999	-9999	-9999	-9999	-9999	-9999	-9999	-9999	-9999	-9999	0.017753
Subsurface	Small zooplankton (50-200 microns) production (mg C m-3 d-1)	-9999	-9999	-9999	-9999	-9999	-9999	-9999	-9999	-9999	-9999	-9999	-9999	-9999	-9999	-9999	-9999	-9999	-9999	-9999	-9999	-9999	-9999	-9999	-9999	-9999	-9999	-9999	-9999	-9999	-9999	-9999	-9999	-9999	-9999	-9999	-9999	-9999	-9999	-9999	-9999	-9999	-9999	-9999	-9999	-9999	-9999	-9999	0.00935437
Subsurface	Small zooplankton (50-200 microns) biomass (mg C m-3)	-9999	-9999	-9999	-9999	-9999	-2.47284	-9999	-9999	-3.26167	-1.25148	-0.846173	-9999	-9999	-9999	-1.17812	-0.646237	-0.500464	-9999	-9999	-9999	-9999	-2.75062	-0.594902	-0.391843	-0.30883	-9999	-9999	-9999	-9999	-9999	-9999	-1.20184	-0.309378	-0.21193	-0.139092	-0.15923	-0.308222	-9999	-9999	-9999	-9999	-9999	-0.409155	-0.114737	-0.0533047	-0.0130698	0.0216088	0.197681
Subsurface	Small zooplankton (50-200 microns) egestion/excretion (mg C m-3 d-1)	-9999	-9999	-9999	-9999	-9999	-9999	-9999	-9999	-9999	-9999	-9999	-9999	-9999	-9999	-9999	-9999	-9999	-9999	-9999	-9999	-9999	-9999	-9999	-9999	-9999	-9999	-9999	-9999	-9999	-9999	-9999	-9999	-9999	-9999	-9999	-9999	-9999	-9999	-9999	-9999	-9999	-9999	-9999	-9999	-9999	-9999	-9999	0.0147679
Subsurface	Mesozoplankton (>200 microns) respiration (mg C m-3 d-1)	-9999	-9999	-9999	-9999	-9999	-9999	-9999	-9999	-9999	-9999	-9999	-9999	-9999	-9999	-9999	-9999	-9999	-9999	-9999	-9999	-9999	-9999	-9999	-9999	-9999	-9999	-9999	-9999	-9999	-9999	-9999	-9999	-9999	-9999	-9999	-9999	-9999	-9999	-9999	-9999	-9999	-9999	-9999	-9999	-9999	-9999	0.0152063	0.137519
Subsurface	Mesozoplankton (>200 microns) production (mg C m-3 d-1)	-9999	-9999	-9999	-9999	-9999	-9999	-9999	-9999	-9999	-9999	-9999	-9999	-9999	-9999	-9999	-9999	-9999	-9999	-9999	-9999	-9999	-9999	-9999	-9999	-9999	-9999	-9999	-9999	-9999	-9999	-9999	-9999	-9999	-9999	-9999	-9999	-9999	-9999	-9999	-9999	-9999	-9999	-9999	-9999	-9999	-9999	0.00805471	0.0728429
Subsurface	Mesozoplankton (>200 microns) biomass (mg C m-3)	-9999	-9999	-9999	-9999	-9999	-49.8346	-9999	-9999	-65.7799	-25.274	-17.1226	-9999	-9999	-9999	-23.8237	-13.097	-10.1749	-9999	-9999	-9999	-9999	-55.7265	-12.0878	-7.994	-6.3377	-9999	-9999	-9999	-9999	-9999	-9999	-24.5142	-6.3529	-4.39452	-2.92928	-3.45896	-7.23964	-9999	-9999	-9999	-9999	-9999	-8.49117	-2.44703	-1.21565	-0.388679	0.275032	3.22177
Subsurface	Mesozoplankton (>200 microns) excretion/egestion (mg C m-3 d-1)	-9999	-9999	-9999	-9999	-9999	-9999	-9999	-9999	-9999	-9999	-9999	-9999	-9999	-9999	-9999	-9999	-9999	-9999	-9999	-9999	-9999	-9999	-9999	-9999	-9999	-9999	-9999	-9999	-9999	-9999	-9999	-9999	-9999	-9999	-9999	-9999	-9999	-9999	-9999	-9999	-9999	-9999	-9999	-9999	-9999	-9999	0.0126791	0.114664
Subsurface	Net community production (mg C m-3 d-1)	-9999	-9999	-9999	-9999	-9999	-9999	-9999	-9999	-9999	-9999	-9999	-9999	-9999	-9999	-9999	-9999	-9999	-9999	-9999	-9999	-9999	-9999	-9999	-9999	-9999	-9999	-9999	-9999	-9999	-9999	-9999	-9999	-9999	-9999	-9999	-9999	-9999	-9999	-9999	-9999	-9999	-9999	-9999	-9999	-9999	-9999	-9999	-50.0456
Subsurface	Benthos carbon demand (mg C m-2 d-1)	-9999	-9999	-9999	-9999	-9999	250	-9999	-9999	250	250	250	-9999	-9999	-9999	250	250	250	-9999	-9999	-9999	-9999	240.446	239.687	235.631	228.144	-9999	-9999	-9999	-9999	-9999	-9999	214.473	211.729	205.988	196.959	184.49	169.141	-9999	-9999	-9999	-9999	-9999	190.665	186.022	178.683	168.171	154.064	137.669
%%%%%%%%%	%%%%%%%%%%%%%%%%%%%%%%%%%%%%%%%%%%%%%%%%%%%%%%%%%%%%%	%%%%%%%%%	%%%%%%%%%	%%%%%%%%%	%%%%%%%%%	%%%%%%%%%	%%%%%%%%%	%%%%%%%%%	%%%%%%%%%	%%%%%%%%%	%%%%%%%%%	%%%%%%%%%	%%%%%%%%%	%%%%%%%%%	%%%%%%%%%	%%%%%%%%%	%%%%%%%%%	%%%%%%%%%	%%%%%%%%%	%%%%%%%%%	%%%%%%%%%	%%%%%%%%%	%%%%%%%%%	%%%%%%%%%	%%%%%%%%%	%%%%%%%%%	%%%%%%%%%	%%%%%%%%%	%%%%%%%%%	%%%%%%%%%	%%%%%%%%%	%%%%%%%%%	%%%%%%%%%	%%%%%%%%%	%%%%%%%%%	%%%%%%%%%	%%%%%%%%%	%%%%%%%%%	%%%%%%%%%	%%%%%%%%%	%%%%%%%%%	%%%%%%%%%	%%%%%%%%%	%%%%%%%%%	%%%%%%%%%	%%%%%%%%%	%%%%%%%%%	%%%%%%%%%	%%%%%%%%%
[truncated: 1,656 more columns]
